# Supplementary material for: Design and Synthesis of Novel Dehydroepiandrosterone Analogues as Potent Antiproliferative Agents
Source: PubMed Central journal article supplement (PMC6225165; doi:10.3390/molecules23092243), 2018-09-03
Supplement: molecules-23-02243-s001.pdf [file molecules-23-02243-s001.pdf]

# Design and synthesis of novel dehydroepiandrosterone analogues as potent anticancer agents

Xing Huang, Qing-Kun Shen, Hong-Jian Zhang, Jia-Li Li, Hai-Ming Zhang, Yu-Shun Tian\* and Zhe-Shan Quan\*

*Key Laboratory of Natural Resources and Functional Molecules of the Changbai Mountain, Affiliated Ministry of Education, College of Pharmacy, Yanbian University, Yanji, Jilin, 133002, China.*

\*Corresponding author: Tel: + 86 433 243-6020; Fax: + 86 433 243-6020.

E-mail: [zsquan@ybu.edu.cn](mailto:zsquan@ybu.edu.cn) (Z. S. Quan).

\*Corresponding author: Tel: + 86 433 243-6028; Fax: + 86 433 243-5026.

E-mail: [ystian@ybu.edu.cn](mailto:ystian@ybu.edu.cn) (Y. S. Tian).

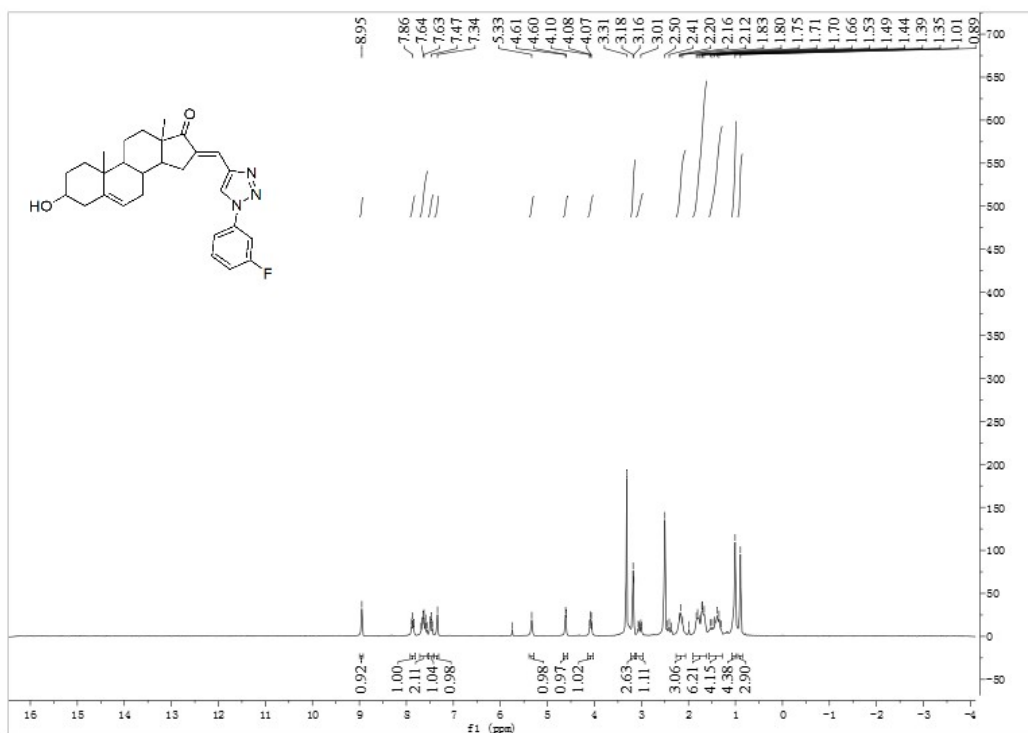

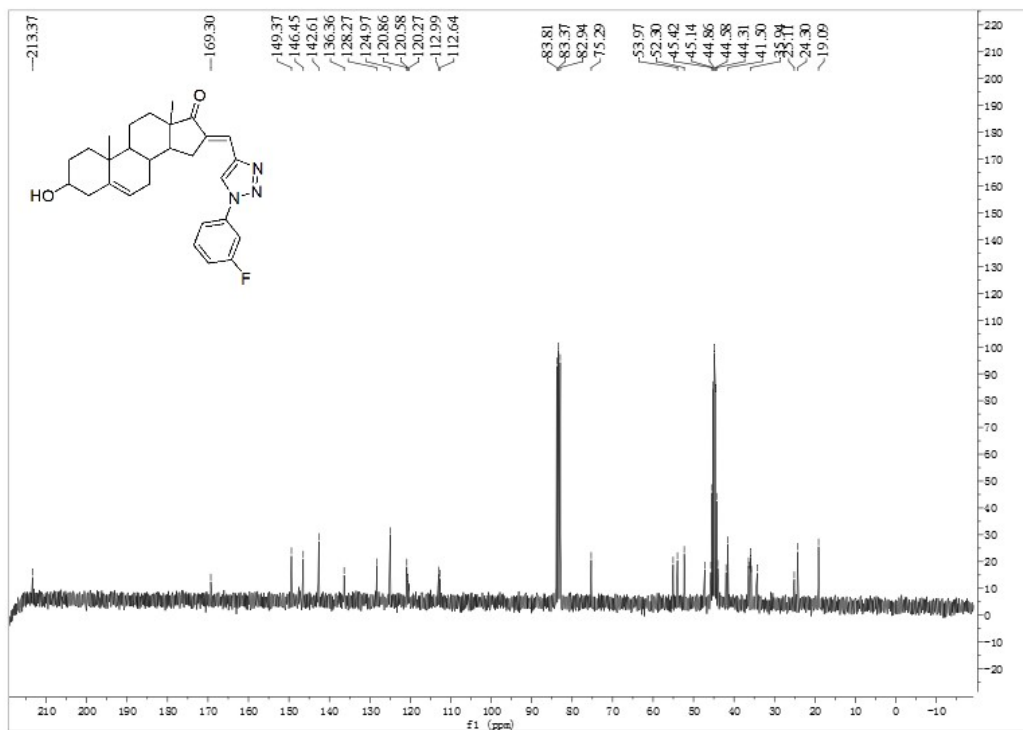

**<sup>1</sup>H-NMR, <sup>13</sup>C-NMR: (E)-16-((1-(3-fluorophenyl)-1H-1,2,3-triazol-4-yl)methylene)-3-hydroxy-10,13-di-methyl-1,3,4,7,8,9,10,11,12,13,15,16-dodecahydro-2H-cyclopenta[a]phenanthren-17(14H)-one (2c)**

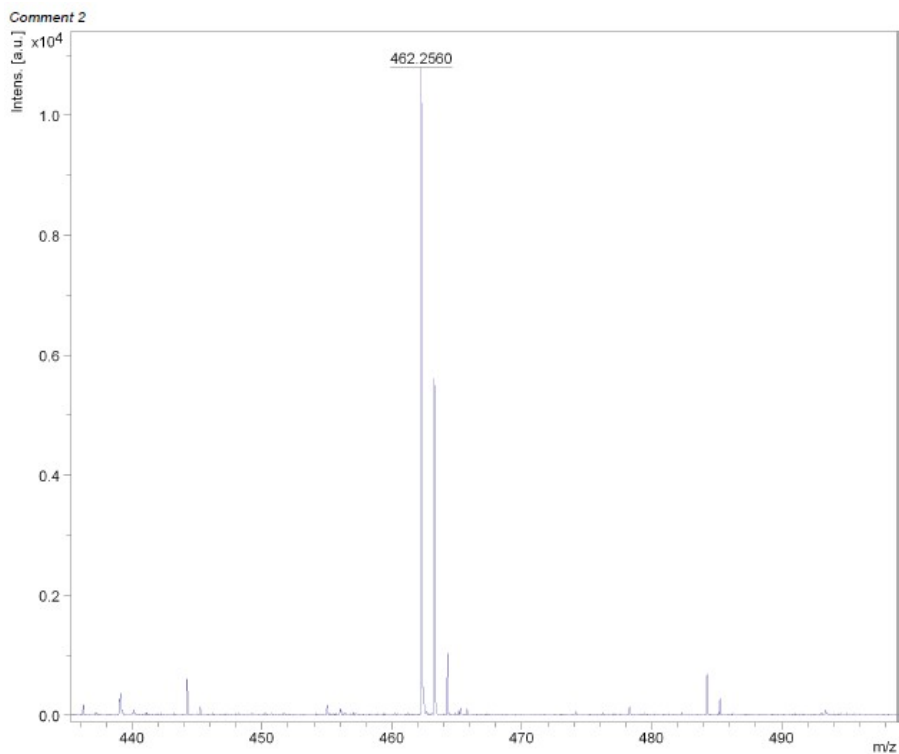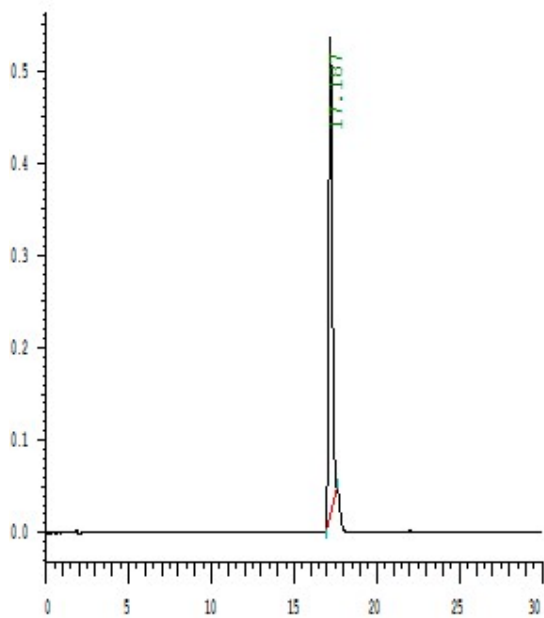

**HRMS, HPLC: (*E*)-16-((1-(3-fluorophenyl)-1*H*-1,2,3-triazol-4-yl)methylene)-3-hydroxy-10,13-di-methyl-1,3,4,7,8,9,10,11,12,13,15,16-dodecahydro-2*H*-cyclopenta[*a*]phenanthren-17(14*H*)-one (2c)**

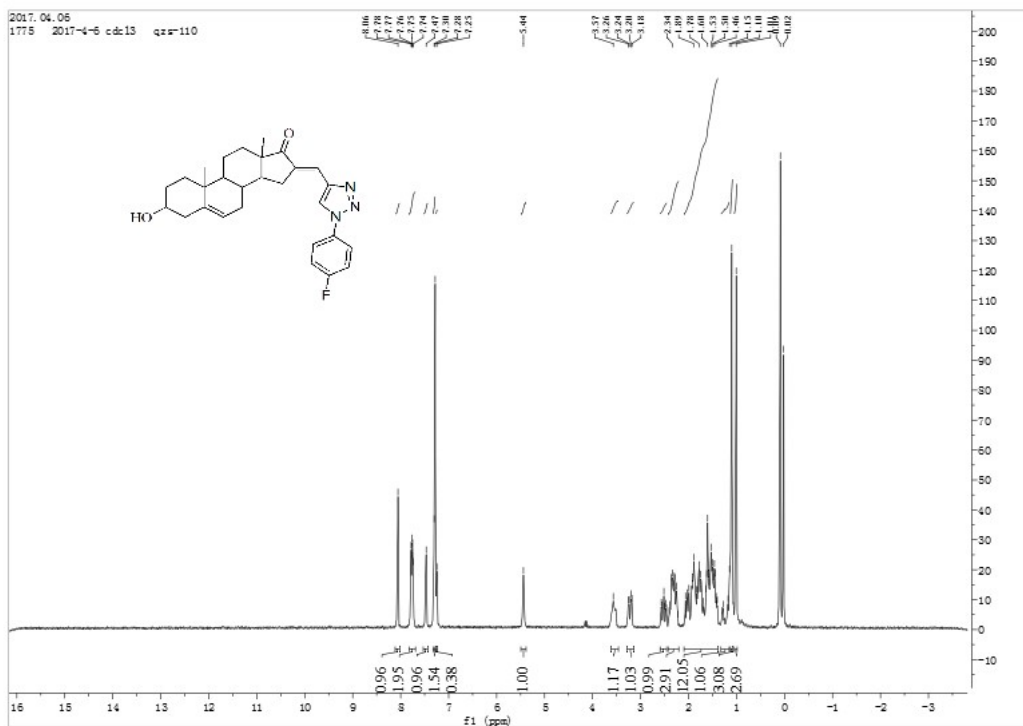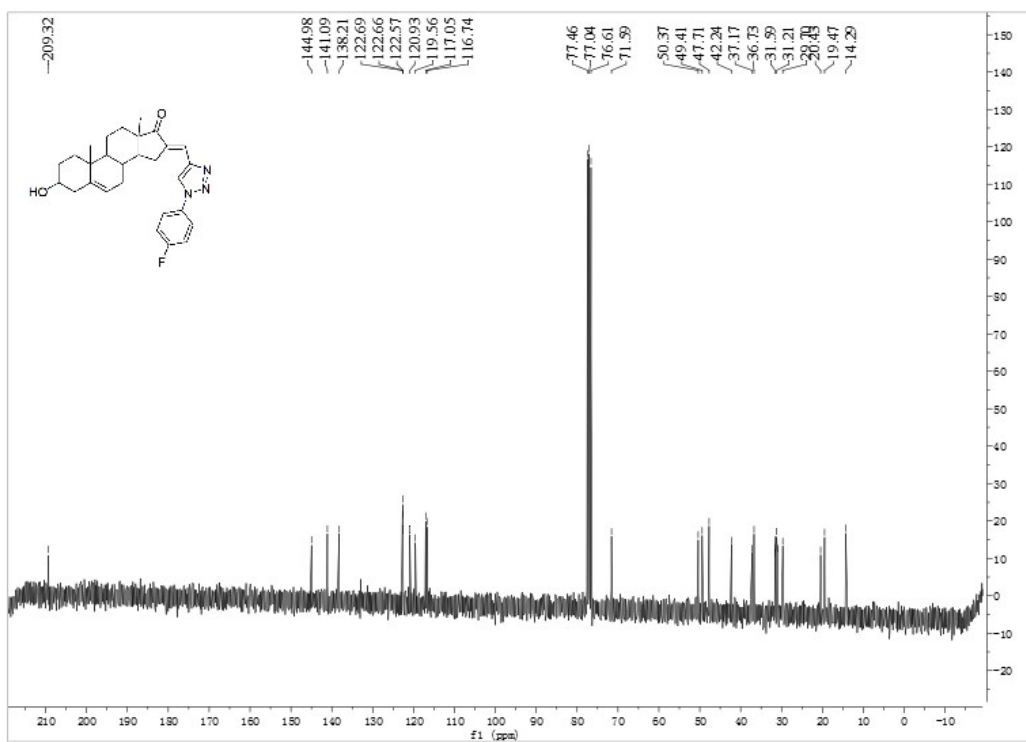

**<sup>1</sup>H-NMR, <sup>13</sup>C-NMR: (E)-16-((1-(4-fluorophenyl)-1H-1,2,3-triazol-4-yl)methylene)-3-hydroxy-10,13-di-methyl-1,3,4,7,8,9,10,11,12,13,15,16-dodecahydro-2H-cyclopenta[a]phenanthren-17(14H)-one (2d)**

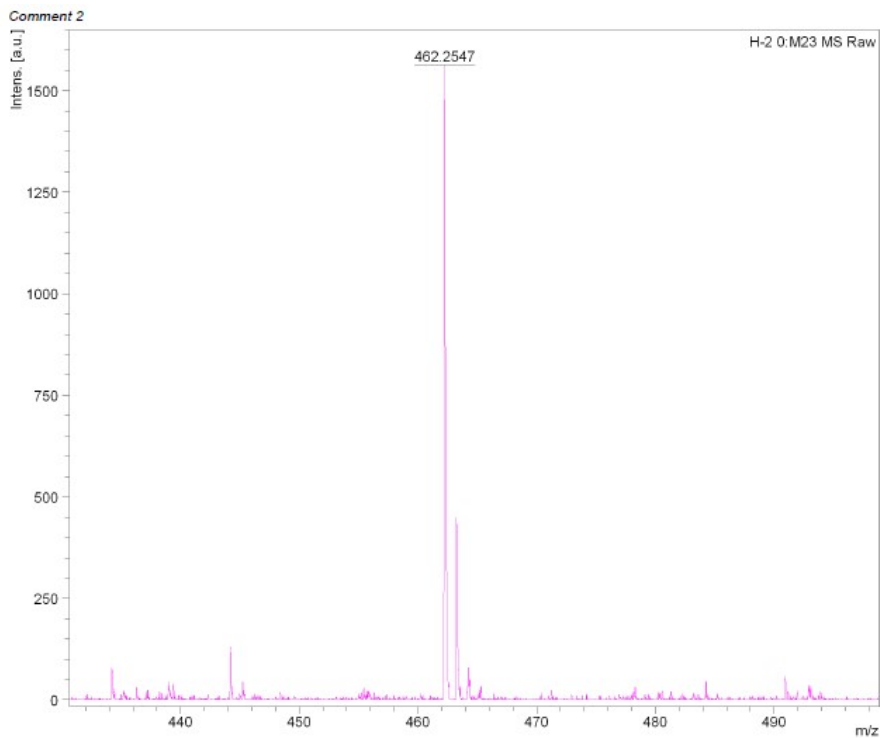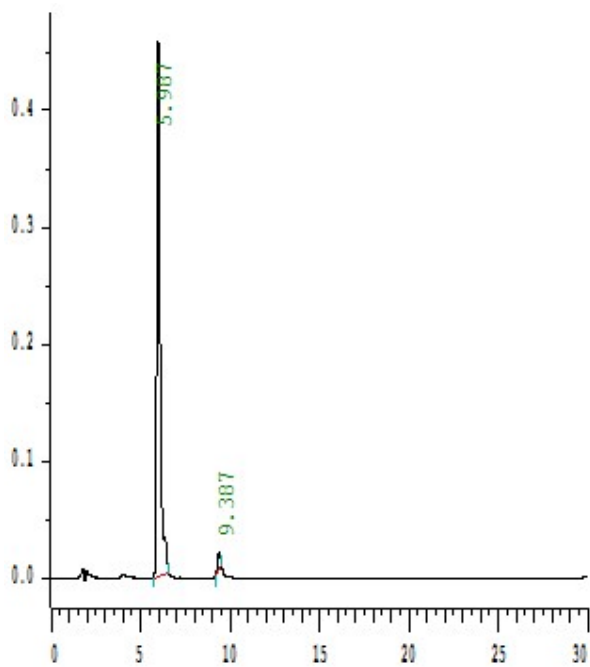

**HRMS, HPLC: (E)-16-((1-(4-fluorophenyl)-1H-1,2,3-triazol-4-yl)methylene)-3-hydroxy-10,13-di-methyl-1,3,4,7,8,9,10,11,12,13,15,16-dodecahydro-2H-cyclopenta[a]phenanthren-17(14H)-one (2d)**

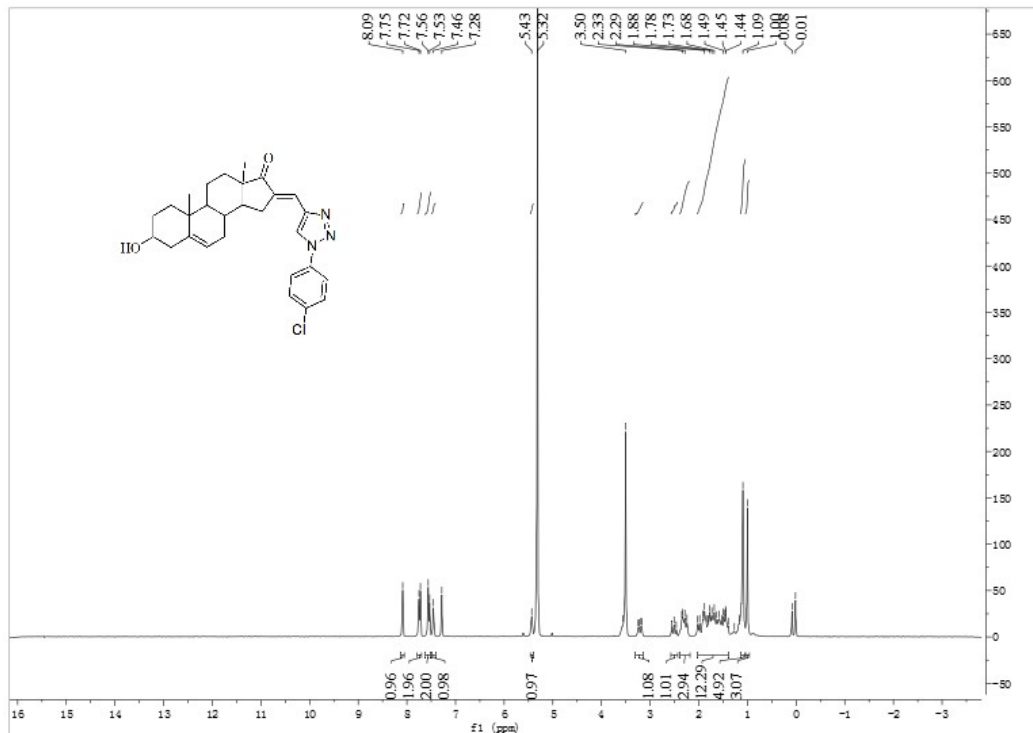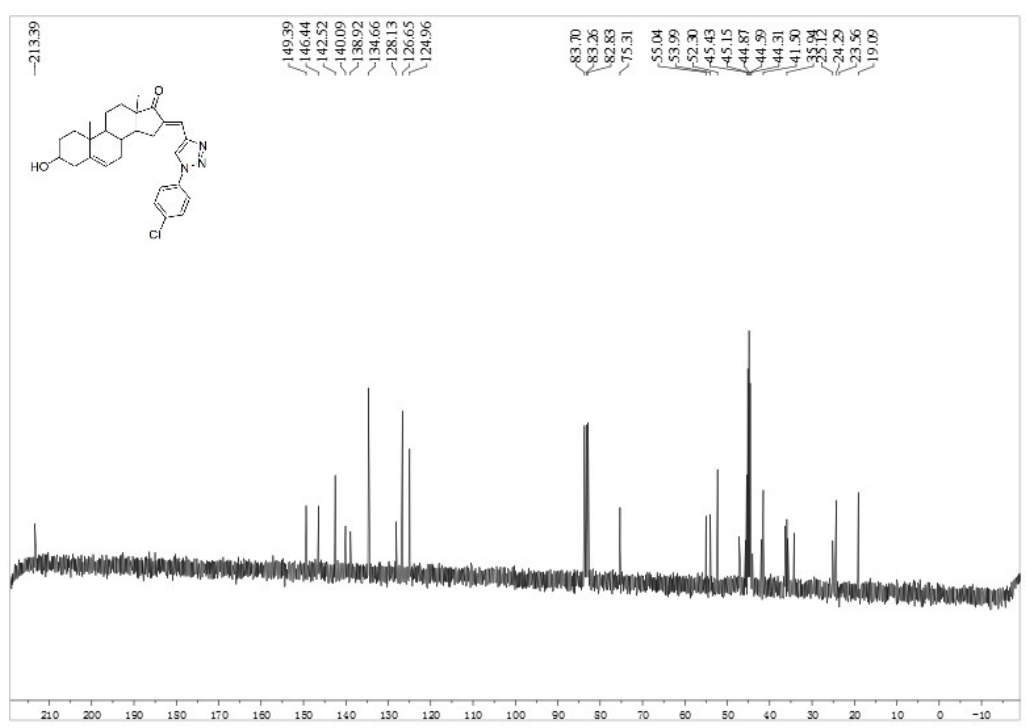

**<sup>1</sup>H-NMR, <sup>13</sup>C-NMR: (*E*)-16-((1-(4-chlorophenyl)-1*H*-1,2,3-triazol-4-yl)methylene)-3-hydroxy-10,13-di-methyl-1,3,4,7,8,9,10,11,12,13,15,16-dodecahydro-2*H*-cyclopenta[*a*]phenanthren-17(14*H*)-one (2g)**

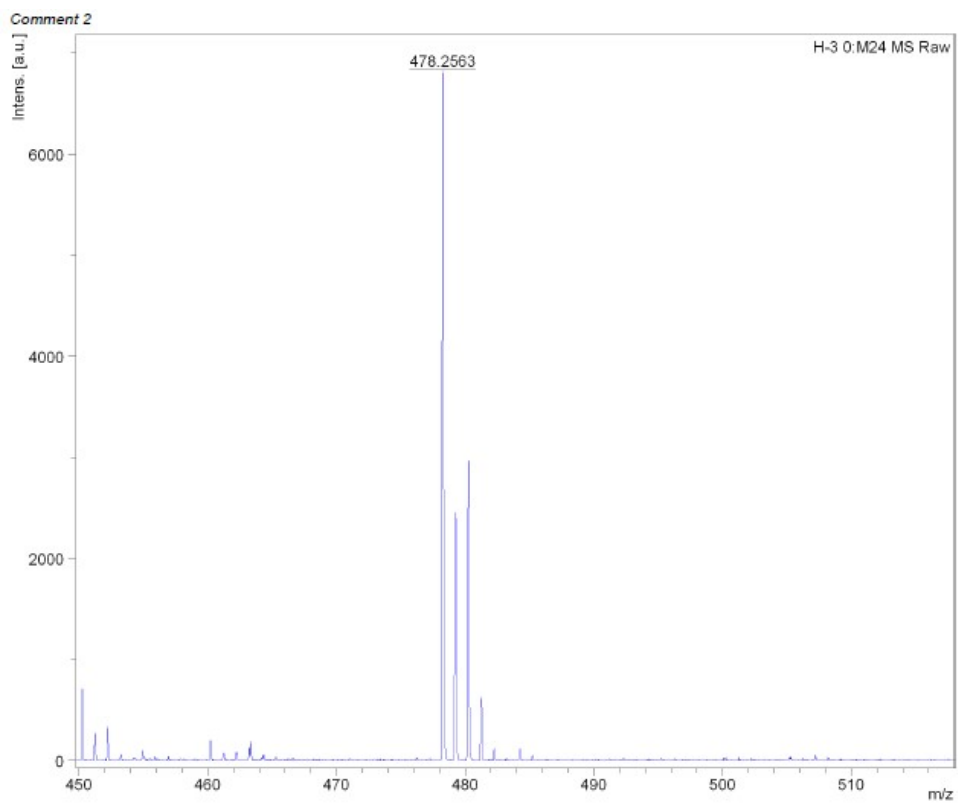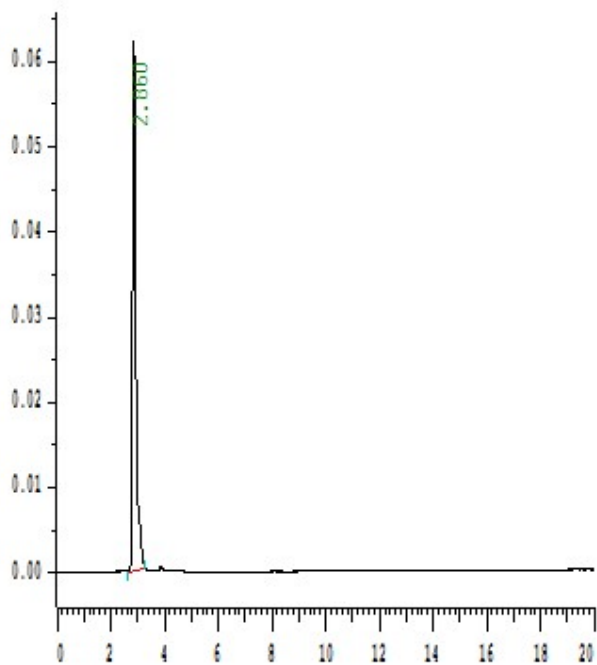

**HRMS, HPLC: (E)-16-((1-(4-chlorophenyl)-1H-1,2,3-triazol-4-yl)methylene)-3-hydroxy-10,13-di-methyl-1,3,4,7,8,9,10,11,12,13,15,16-dodecahydro-2H-cyclopenta[a]phenanthren-17(14H)-one (2g)**

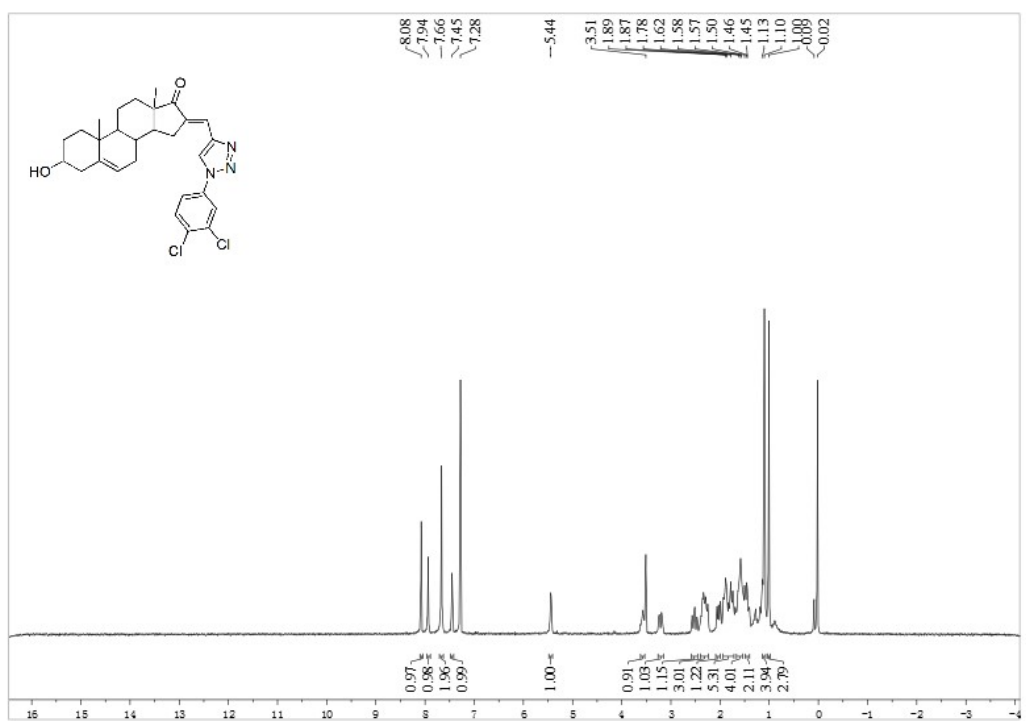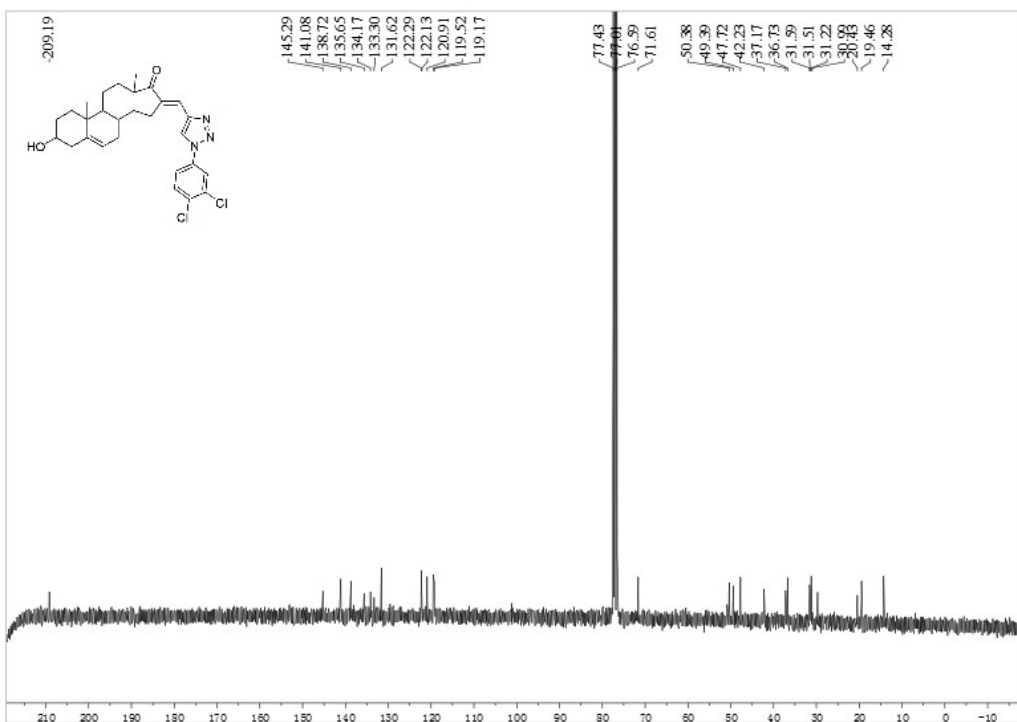

**<sup>1</sup>H-NMR, <sup>13</sup>C-NMR: (*E*)-16-((1-(3,4-dichlorophenyl)-1*H*-1,2,3-triazol-4-yl)methylene)-3-hydroxy-10,13dimethyl-1,3,4,7,8,9,10,11,12,13,15,16-dodecahydro-2*H*-cyclopenta[*a*]phenanthren-17(14*H*)-one (2h)**



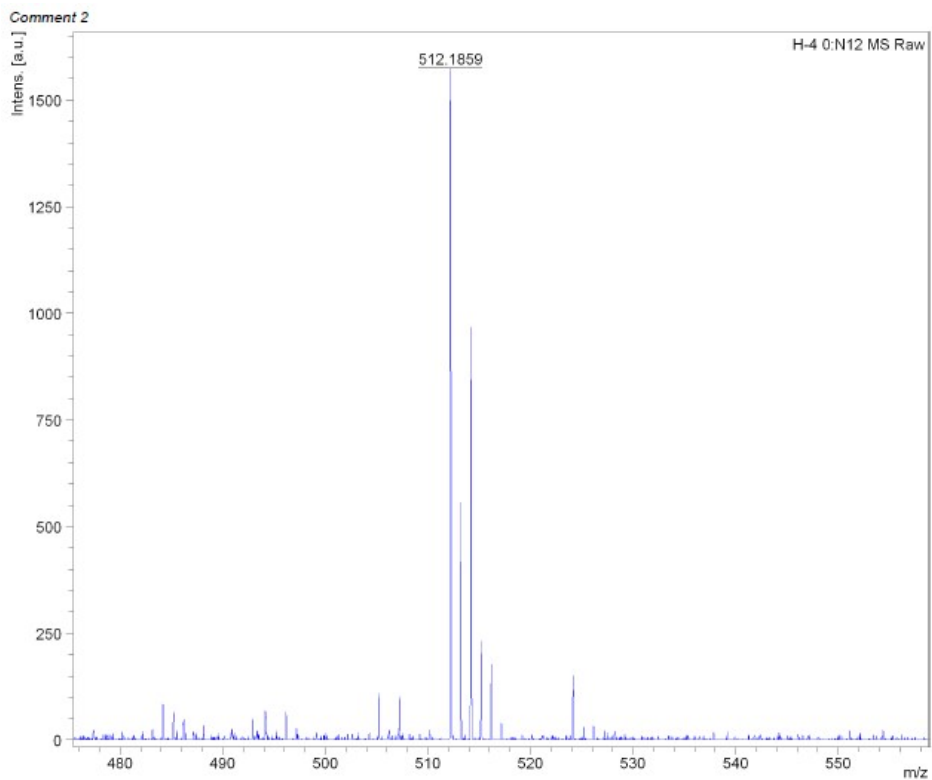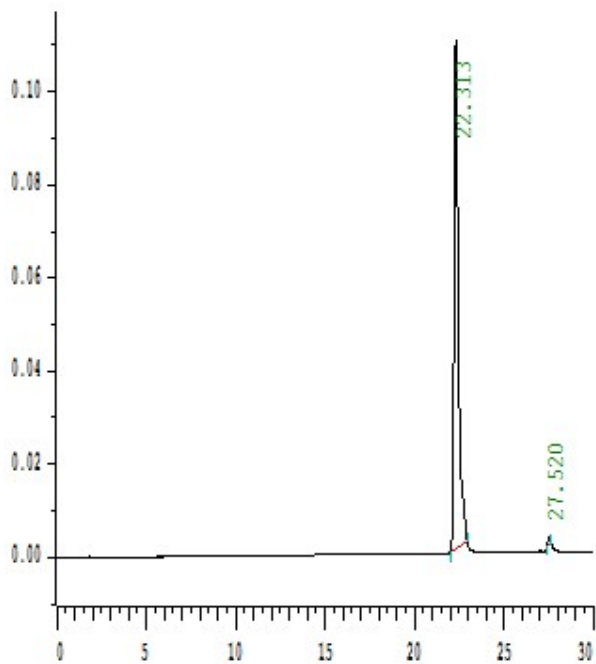

**HRMS, HPLC: (*E*)-16-((1-(3,4-dichlorophenyl)-1*H*-1,2,3-triazol-4-yl)methylene)-3-hydroxy-10,13-dimethyl-1,3,4,7,8,9,10,11,12,13,15,16-dodecahydro-2*H*-cyclopenta[*a*]phenanthren-17(14*H*)-one (2h)**



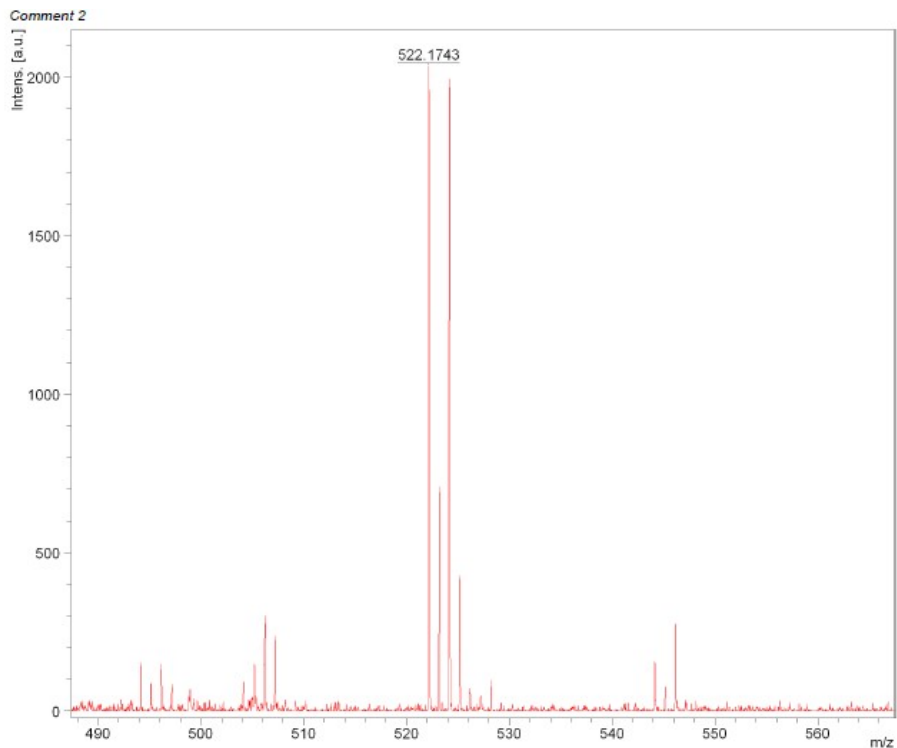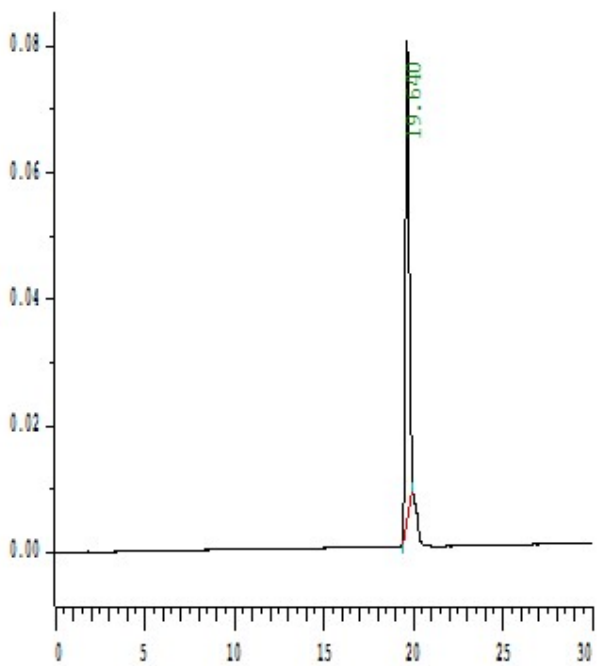

**HRMS, HPLC: (E)-16-((1-(4-bromophenyl)-1H-1,2,3-triazol-4-yl)methylene)-3-hydroxy-10,13-di-methyl-1,3,4,7,8,9,10,11,12,13,15,16-dodecahydro-2H-cyclopenta[a]phenanthren-17(14H)-one(2k)**

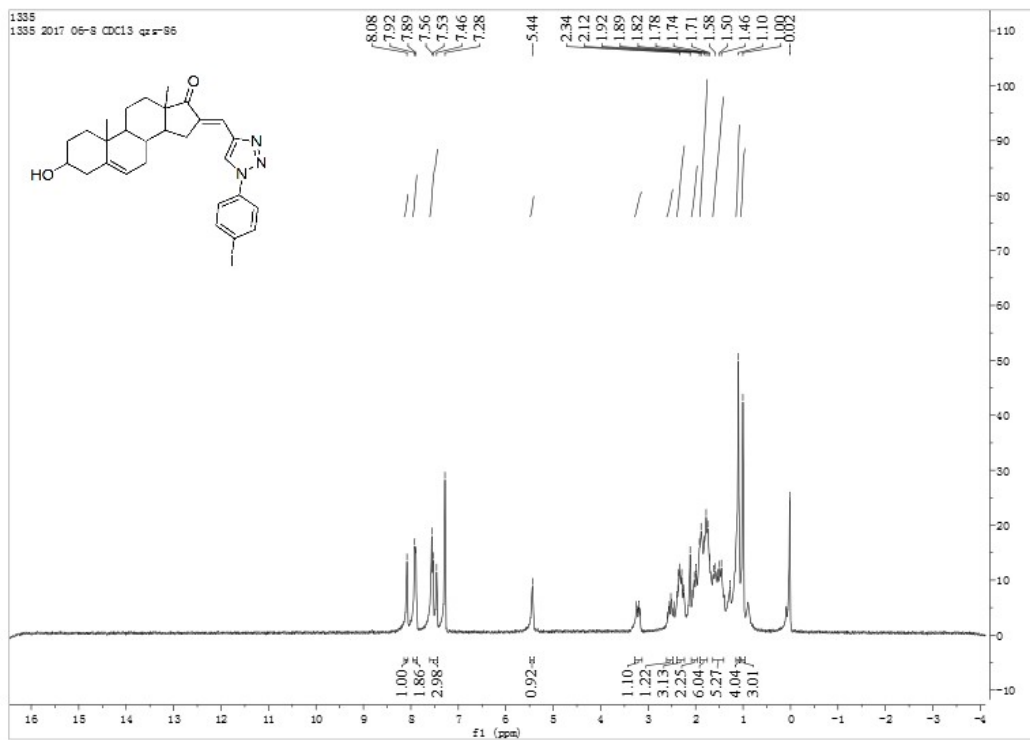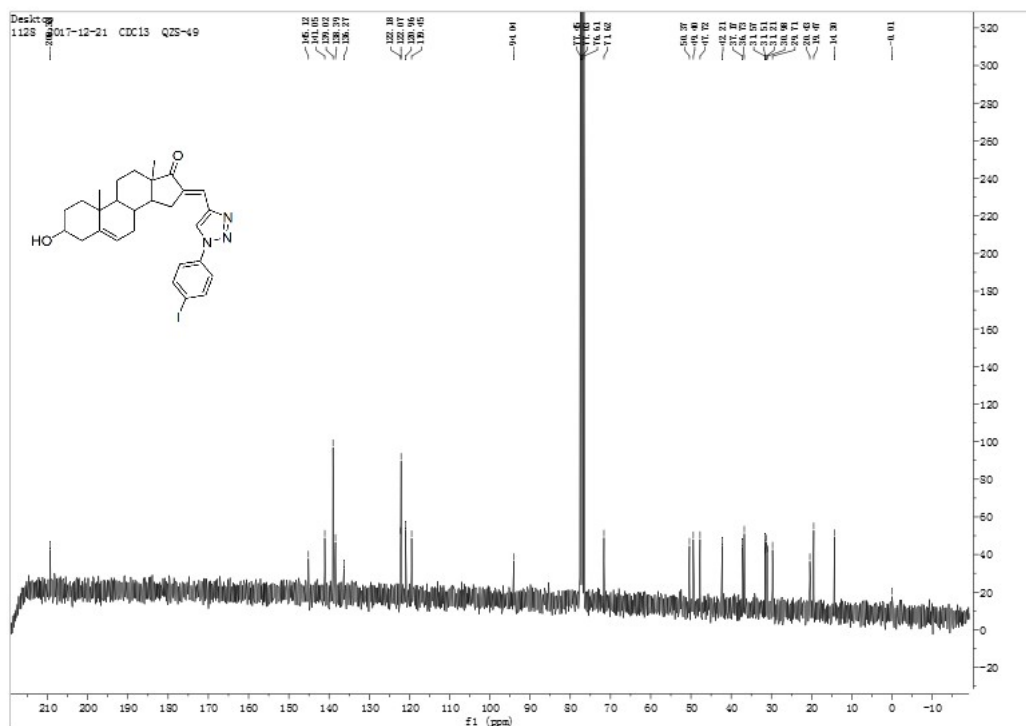

**<sup>1</sup>H-NMR, <sup>13</sup>C-NMR: (E)-3-hydroxy-16-((1-(4-iodophenyl)-1H-1,2,3-triazol-4-yl)methylene)-10,13-dimethyl-1,3,4,7,8,9,10,11,12,13,15,16-dodecahydro-2H-cyclopenta[a]phenanthren-17(14H)-one (2n)**

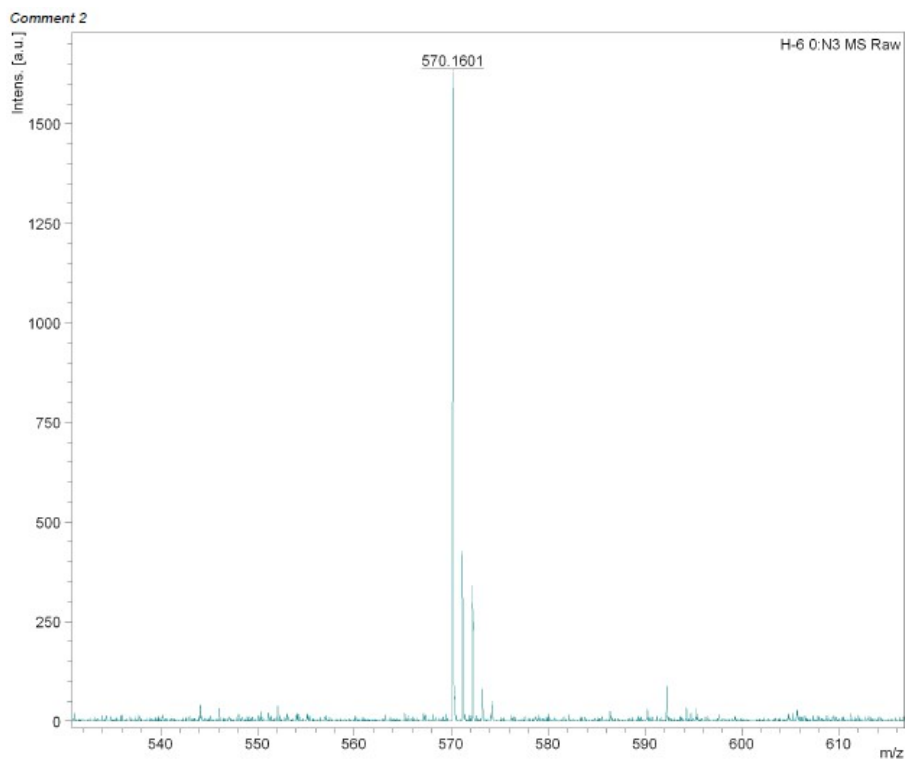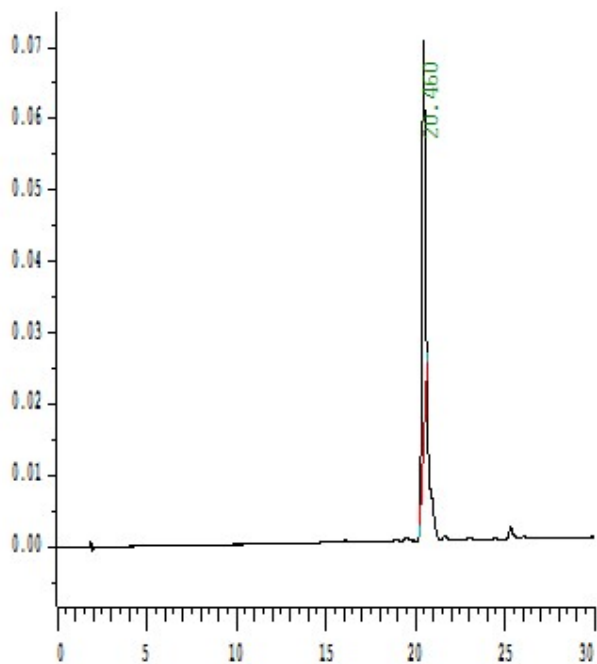

**HRMS, HPLC: (*E*)-3-hydroxy-16-((1-(4-iodophenyl)-1*H*-1,2,3-triazol-4-yl)methylene)-10,13-dimethyl-1,3,4,7,8,9,10,11,12,13,15,16-dodecahydro-2*H*-cyclopenta[*a*]phenanthren-17(14*H*)-one (2n)**

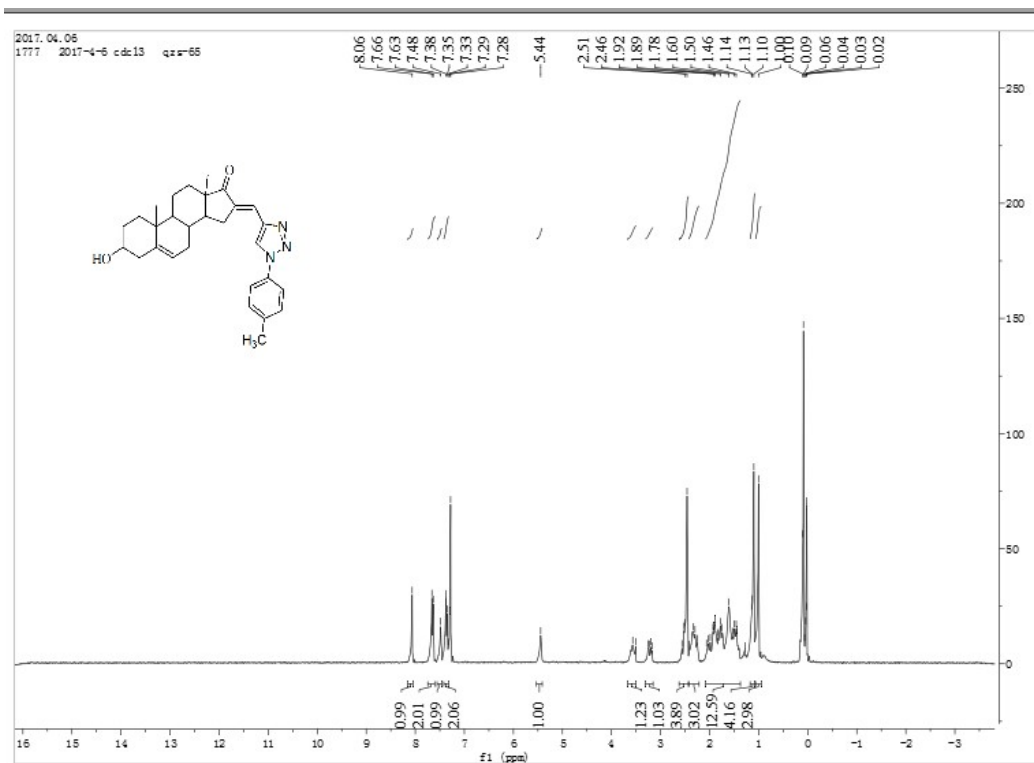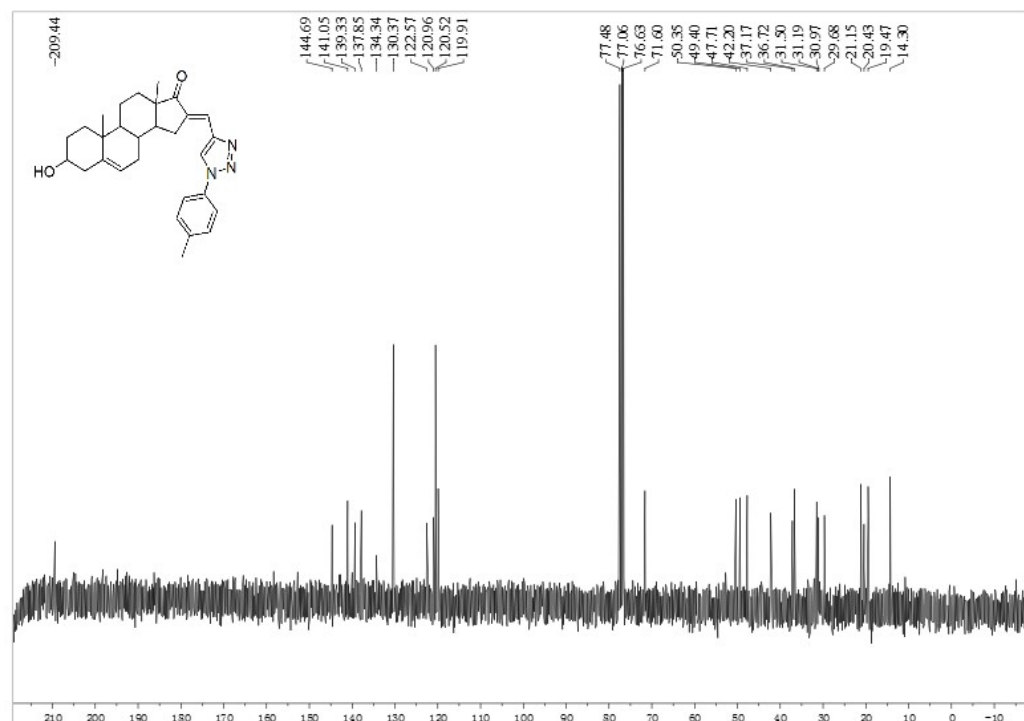

**<sup>1</sup>H-NMR, <sup>13</sup>C-NMR: *(E)*-3-hydroxy-10,13-dimethyl-16-((1-*p*-tolyl-1*H*-1,2,3-triazol-4-yl)methylene)-1,3,4,7,8,9,10,11,12,13,15,16-dodecahydro-2*H*-cyclopenta[*a*]phenanthren-17(14*H*)-one (2p)**

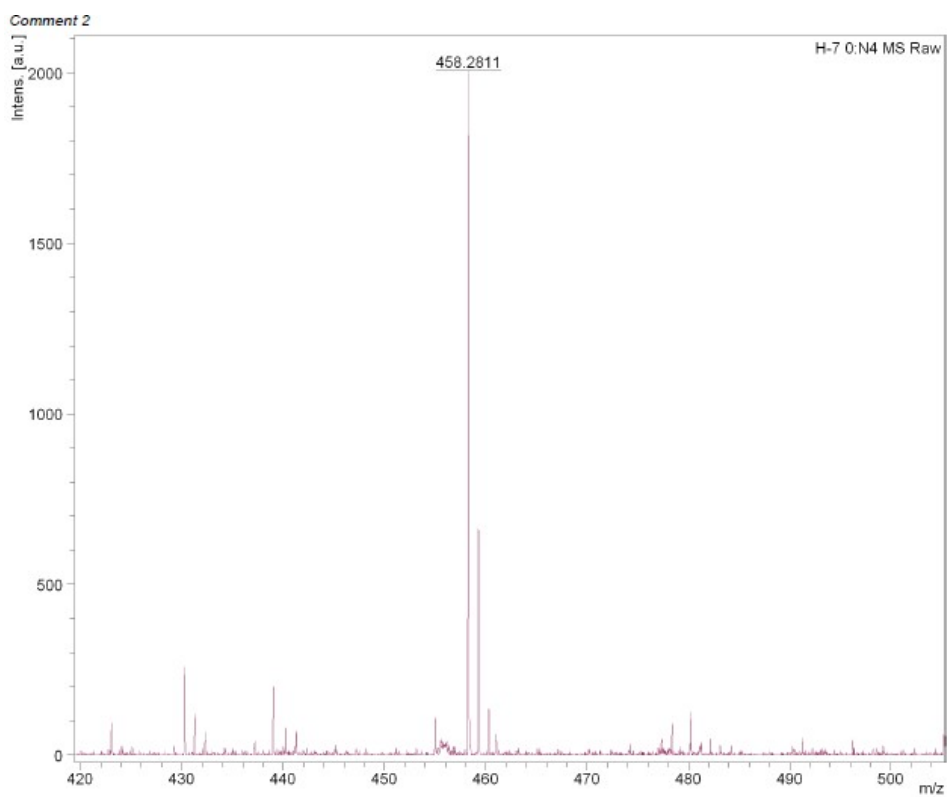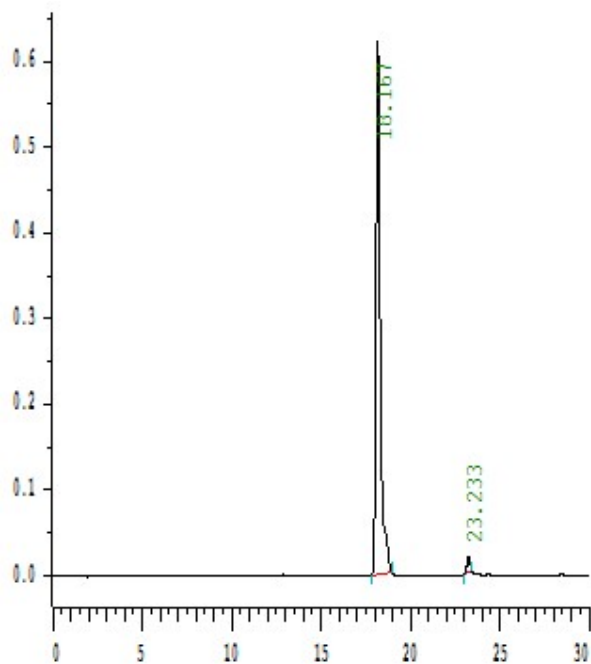

**HRMS, HPLC: (*E*)-3-hydroxy-10,13-dimethyl-16-((1-*p*-tolyl-1*H*-1,2,3-triazol-4-yl)methylene)-1,3,4,7,8,9,10,11,12,13,15,16-dodecahydro-2*H*-cyclopenta[*a*]phenanthren-17(14*H*)-one (2p)**

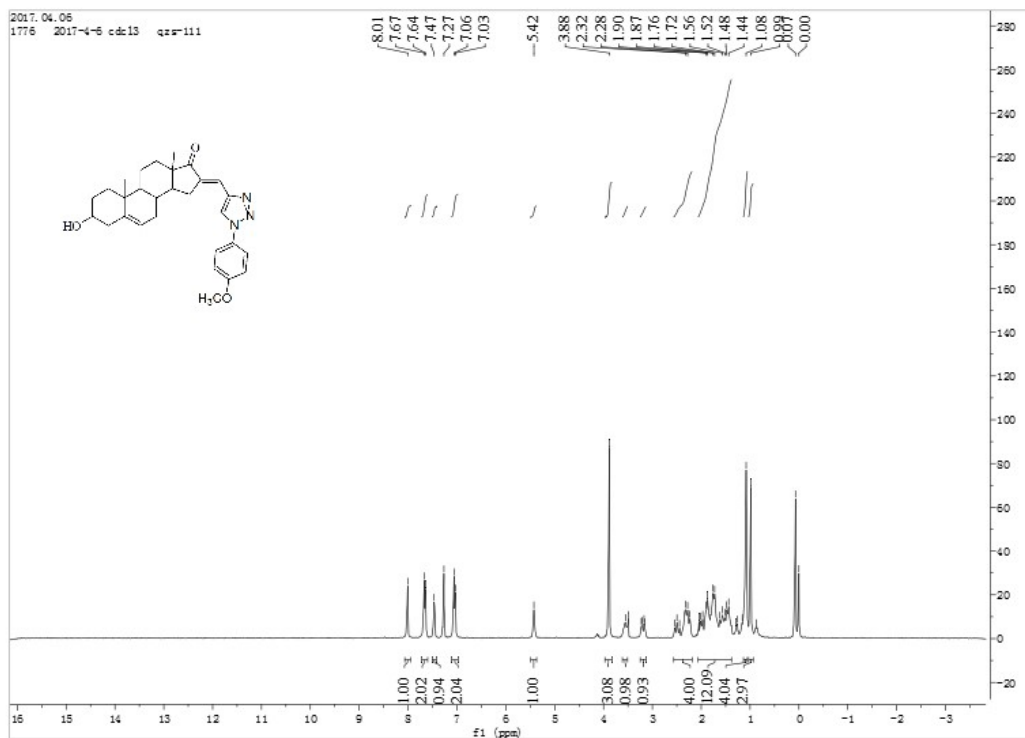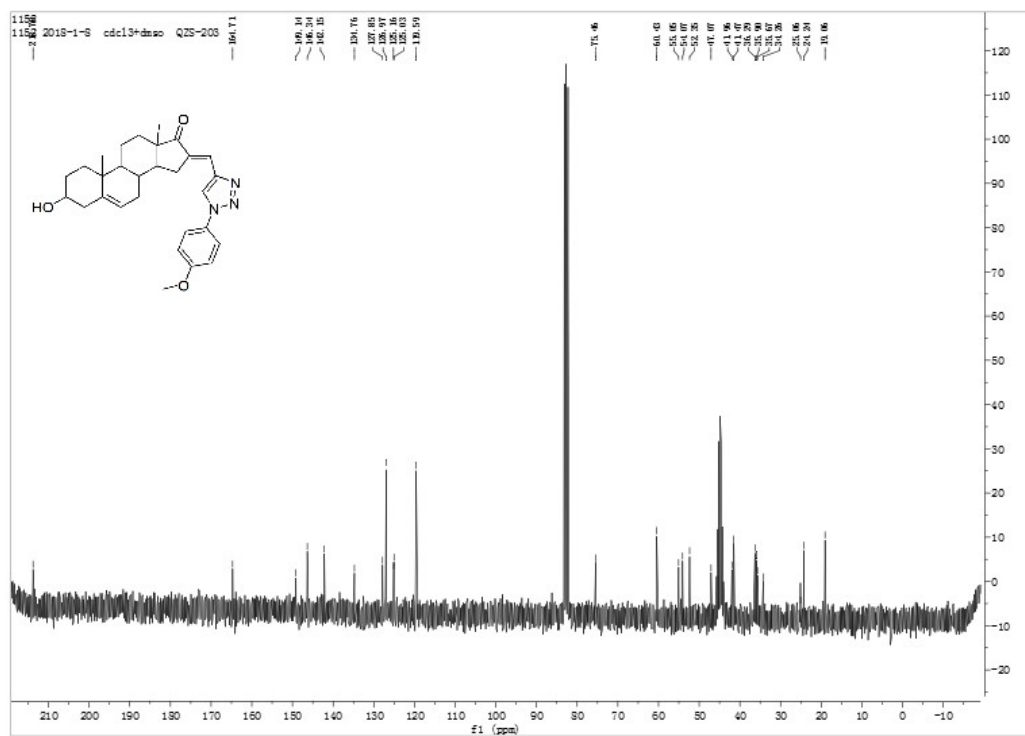

**<sup>1</sup>H-NMR, <sup>13</sup>C-NMR: (*E*)-3-hydroxy-16-((1-(4-methoxyphenyl)-1*H*-1,2,3-triazol-4-yl)methylene)-10,13-dimethyl-1,3,4,7,8,9,10,11,12,13,15,16-dodecahydro-2*H*-cyclopenta[*a*]phenanthren-17(14*H*)-one (2s)**



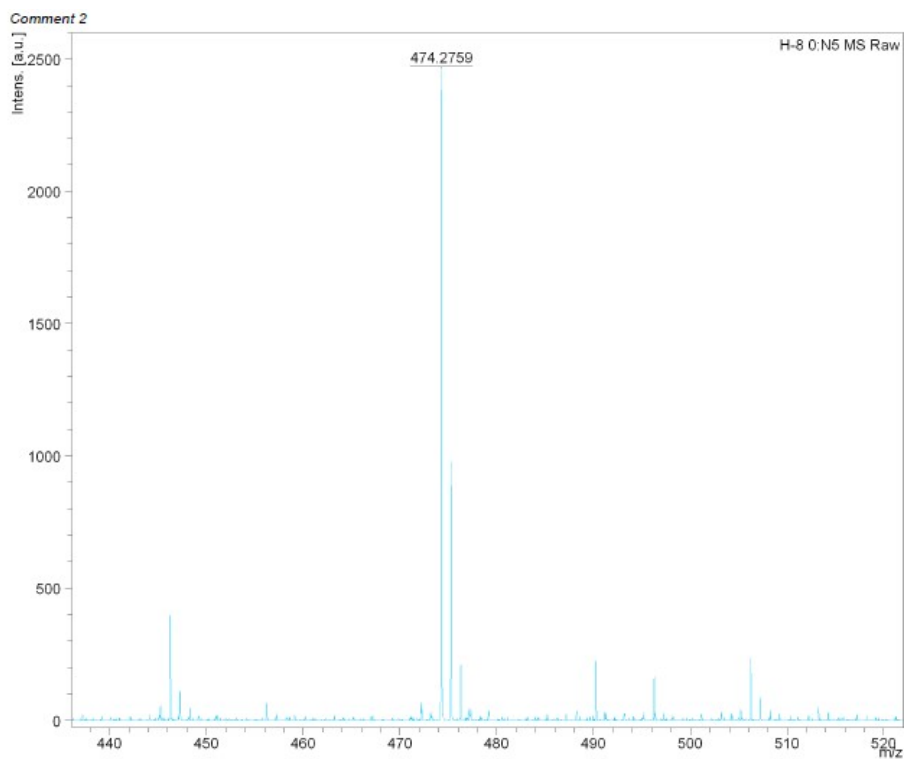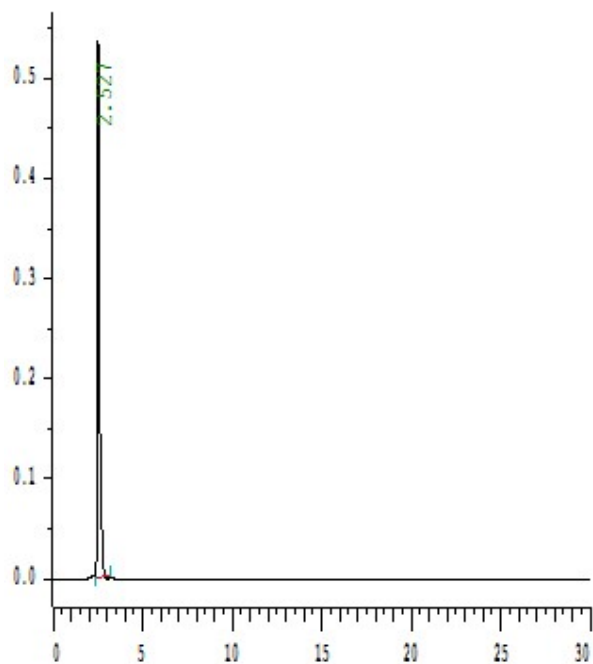

**HRMS, HPLC: (*E*)-3-hydroxy-16-((1-(4-methoxyphenyl)-1*H*-1,2,3-triazol-4-yl)methylene)-10,13-dimethyl-1,3,4,7,8,9,10,11,12,13,15,16-dodecahydro-2*H*-cyclopenta[*a*]phenanthren-17(14*H*)-one (2s)**



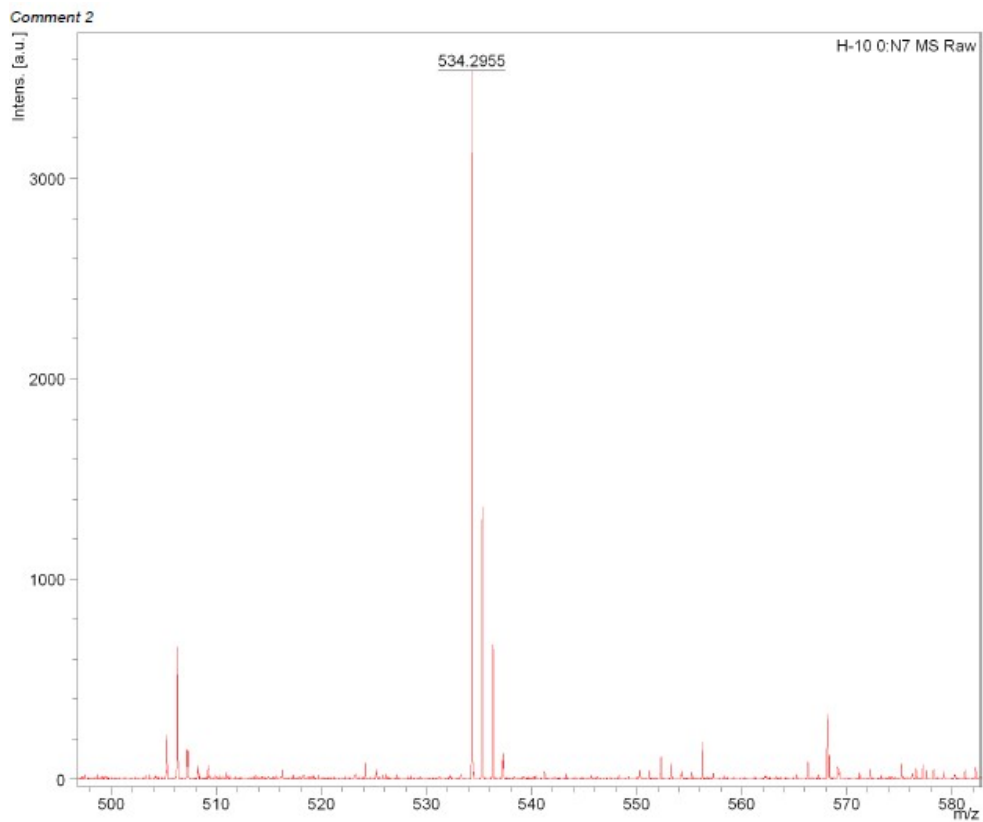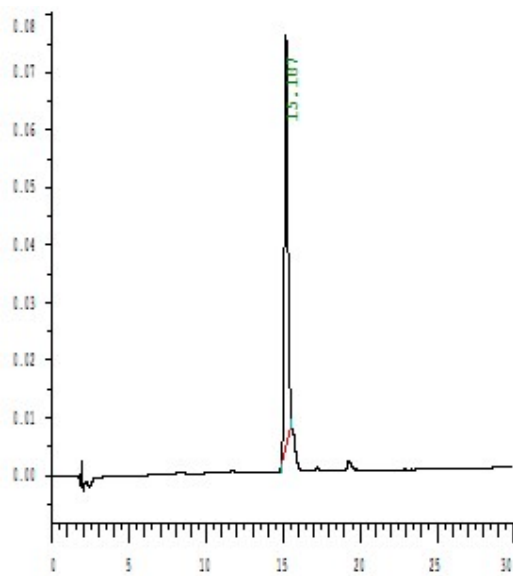

**HRMS,HPLC:(*E*)-3-hydroxy-10,13-dimethyl-16-((1-(3,4,5-trimethoxyphenyl)-1*H*-1,2,3-triazol-4-yl)methylene)-1,3,4,7,8,9,10,11,12,13,15,16-dodecahydro-2*H*-cyclopenta[*a*]phenanthren-17(14*H*)-one (2u)**
